# Supplementary material
Source: PubMed Central journal article supplement (PMC7875542)
Supplement: NIHMS1663125-supplement-supplementary_materials.pdf [file NIHMS1663125-supplement-supplementary_materials.pdf]

---

**Supplementary information**

---

**Immune receptor inhibition through  
enforced phosphatase recruitment**

---

In the format provided by the  
authors and unedited

# Supplementary Figure 1

Figure 1f

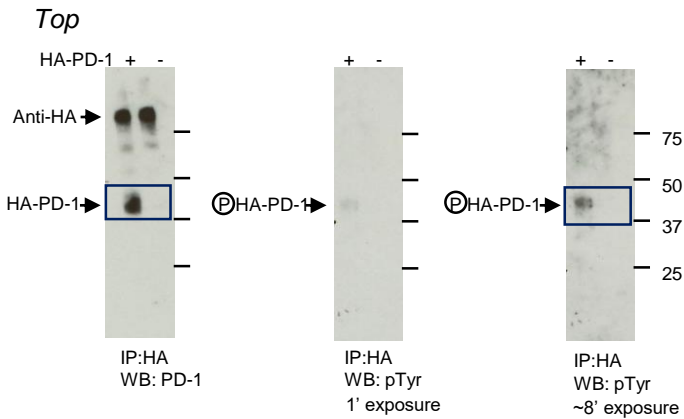

Figure 2e

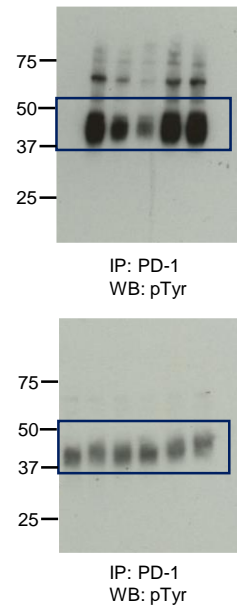

**Bottom**

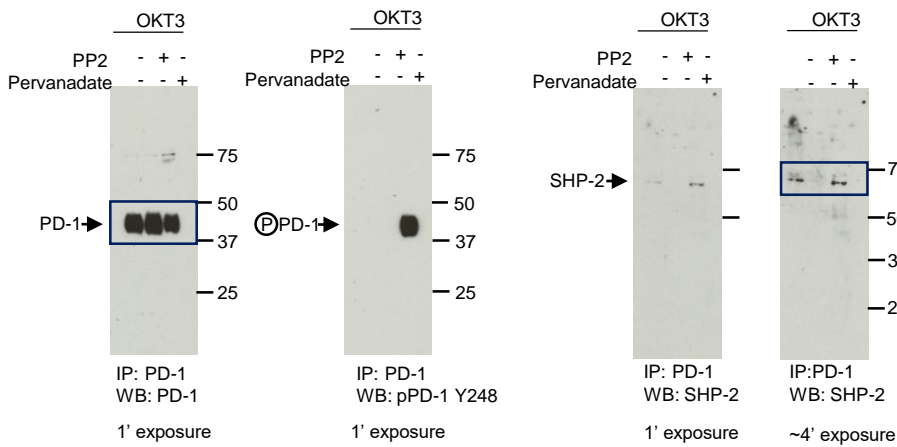

Figure 5a

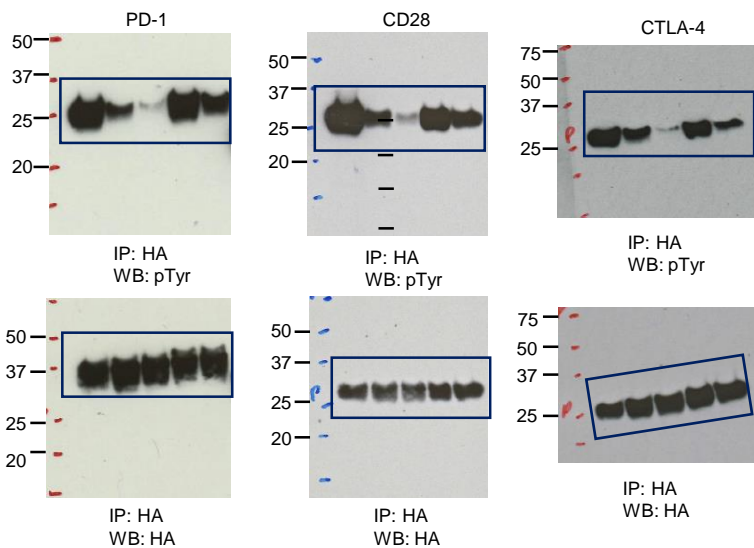

Figure 5d

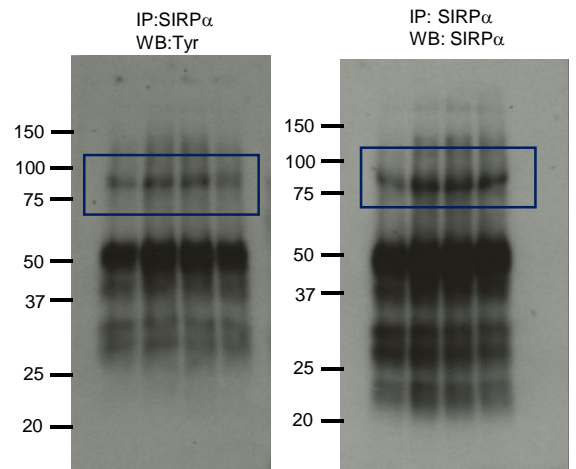

Supplementary Fig. 1. Raw western blot source images. Arrows indicate band of interest. Boxes indicate cropping for representative images. Corresponding Figures are indicated. (Continues next page.)

# Supplementary Figure 1 (cont.)

## Extended Data Figure 5c

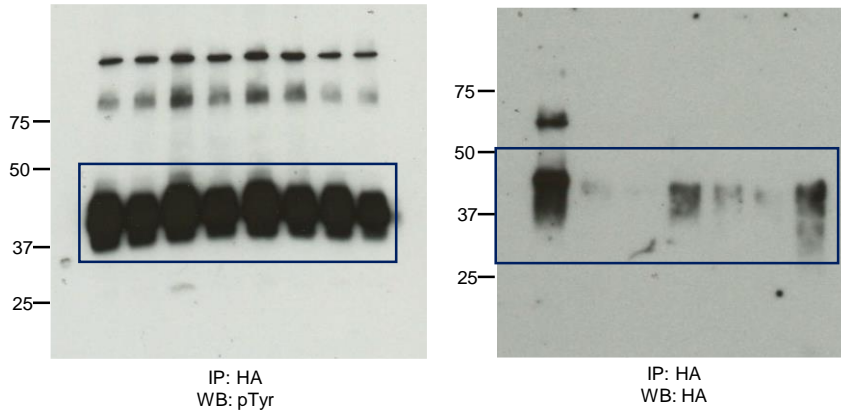

## Extended Data Figure 10a

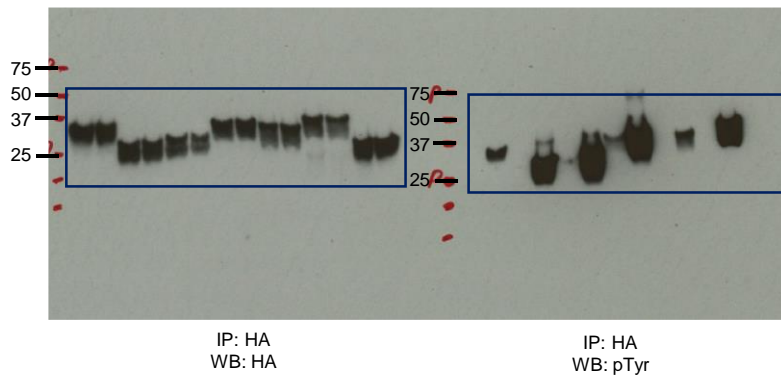

## Extended Data Figure 10b

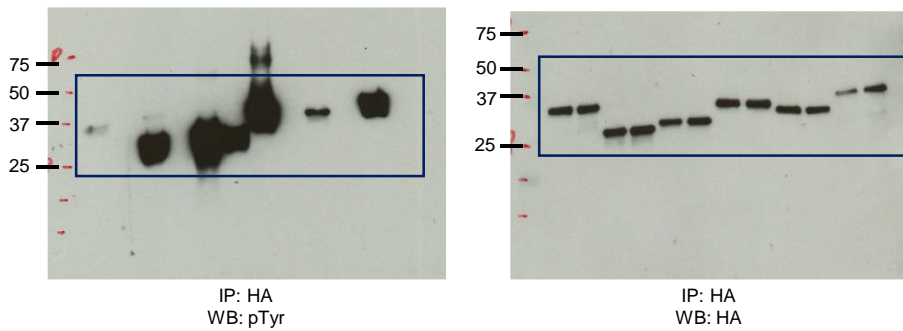

## Extended Data Figure 10g

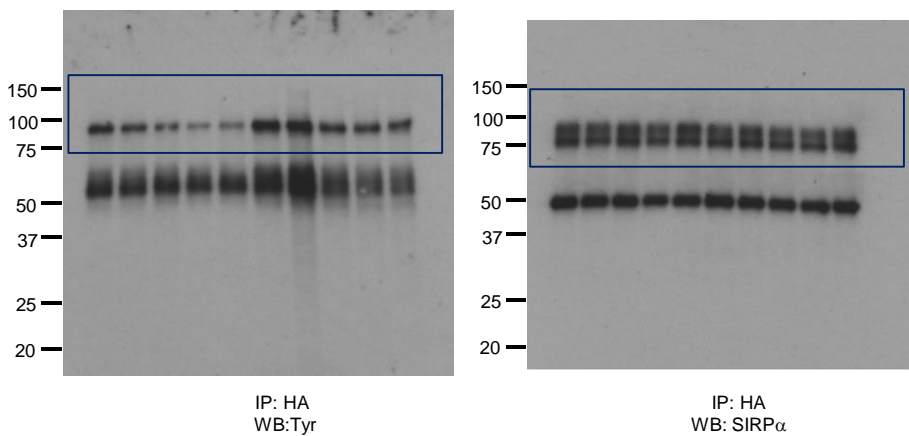

Supplementary Fig. 1. (Cont.) Raw western blot source images. Arrows indicate band of interest. Boxes indicate cropping for representative images. Corresponding Figures are indicated. (Continues next page.)

# Supplementary Figure 2

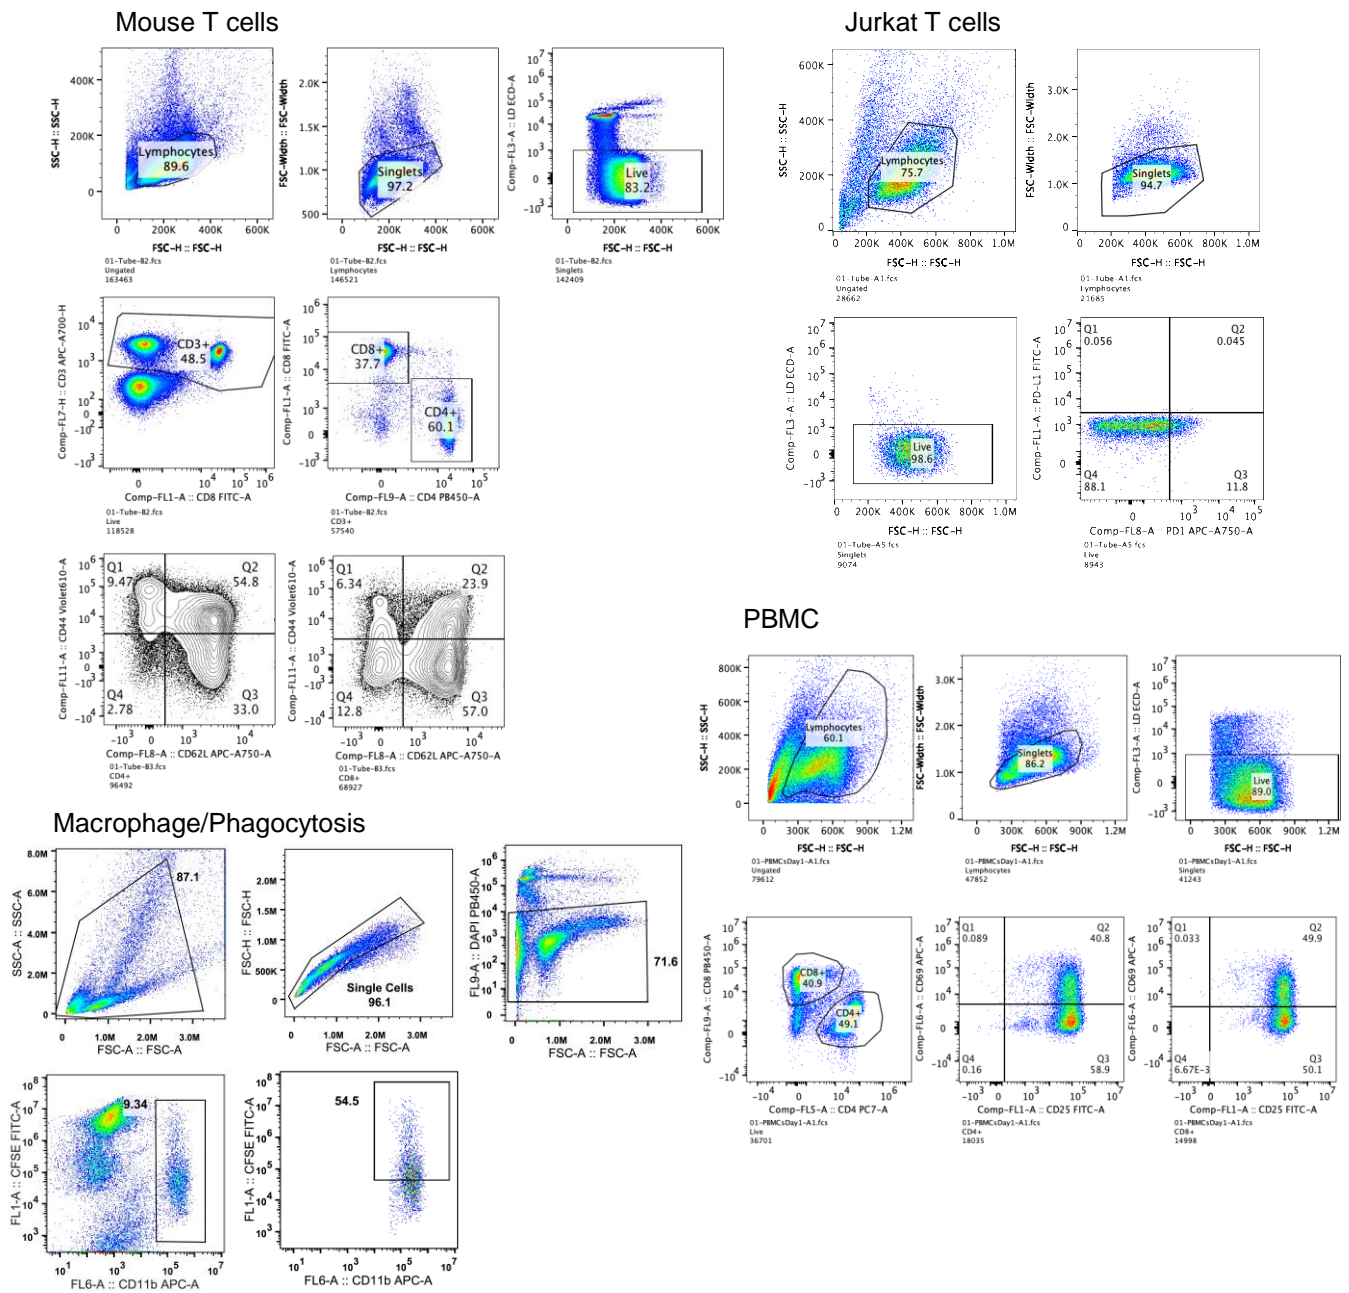

Supplementary Fig. 2. Representative gating strategy for mouse T cells, Jurkat T cell line, human PBMCs and human macrophages, as indicated.
